# Supplementary material for: CPSF6 promotes the Warburg effect and angiogenesis leading to tumor progression via c-Myc/ FBW7/ VEGF/ PD-L1 signaling axis with its siRNA synergistic potential with Sorafenib as a therapeutic target for liver cancer therapy.
Source: Research Square preprint supplement (doi:10.21203/rs.3.rs-3143964/v1), 2023-07-11
Supplement: Supplementary file 1 [file 9aa8b88894ee54aa587ad240.docx]

**CPSF6 promotes glycolysis, angiogenesis and immune escape leading to cancer progression via VEGF/PD-L1 and c-Myc/ FBW-7 signaling axes in hepatocellular carcinoma**

Deok Yong Sim, Hyo–Jung Lee, Chi-Hoon Ahn, JiEon Park, Su-Yeon Park, Bum-Sang Shim, Bonglee Kim* and Sung-Hoon Kim*

Cancer Molecular Targeted Herbal Research Laboratory, College of Korean Medicine, Kyung Hee University, 26 Kyungheedae-ro, Dongdaemun-gu, Seoul 02447

**Corresponding authors:** Prof. Sung-Hoon Kim, K.M.D, Ph.D and, Prof. Bonglee Kim, K.M.D, Ph.D contributed equally to this study. College of Korean Medicine, Kyung Hee University, 26 Kyungheedae-ro, Dongdaemun-gu, Seoul 02447, Republic of Korea, E-mail: [sungkim7@khu.ac.kr](mailto:sungkim7@khu.ac.kr) and [bongleekim@khu.ac.kr](mailto:bongleekim@khu.ac.kr), respectively.

.

**TCGA data analysis**

Human HCC clinical data (Cancer;373, Normal;50) downloaded from The Cancer Genome Atlas (TCGA) were analyzed for their mRNA expression by using R studio program (Boston, MA, U.S.A.). Survival rates were determined on overall survival stage 1-4 from survival plot database of 423 patients downloaded from Kaplan Meier plotter.

**RNA interference and plasmid transfection**

Hep3B cells were seeded onto culture plate overnight and transfected with the mixtures of CPSF6 siRNA or FBW7 siRNA or SKP2 siRNA or negative control siRNA purchased from Bioneer (Korea) adjusted at 40 nM by using transfection reagent (INTERFERin®, Polyplus, France) according to manufacturer’s protocols. The transfected cells were incubated for 48h for next experiment. Also, CPSF6, V5-c-Myc, HA-Ubiquitination and pcDNA 3.0 plasmids purchased from Addgene (Watertown, MA, USA) were transfected into the cells by using transfection reagent (Turbofect, Thermo Fisher Scientific, Radnor, PA, USA) and then were incubated for 48h for further study.

**Cytotoxicity Assay**

LV-shControl or LV-shCPSF6 Hep3B cells were seeded into 96 well plate at a density of 7×10 3 cells/well and incubated overnight at 37 ℃ for 24h, 48h and 72h. Then 20μl of MTT (3-(4,5-dimethylthiazol-2-yl)-2,5-diphenyltetrazolium bromide; 1mg/ml, 4 Merck KGaA, Germany) was added to each well of the plate and incubated for 2 h at 37 ℃ in dark. After the supernatant was carefully aspirated, 100 μl of DMSO (Ducksan, Korea) was added and the optical density was measured by Biorad microplate reader model 680 (Biorad, USA) at 570nm.

**Western blotting.**

Hep3B cells transfected by transfected by CPSF6 siRNA or negative control siRNA were lysed in NP40 buffer containing 50mM Tris/HCL (pH7.5), 0.5% NonidetP-40, 1mM EDTA, 120 mM NaCl, 1 mM dithiothreitol, 0.2 mM phenylmethylsufonylfluoride with protease inhibitors cocktails (Roche, Mannheim, Germany) and phosphatase inhibitors (Merck KGaA, Darmstadt, Germany). The lysates were quantified by DC Protein Assay Kit II (Bio-Rad, Hercules, CA, USA). The protein samples were electrophoresed on 8 to 15 % SDS-polyacrylamide gels, and transferred to nitrocellulose membranes. Membranes were blocked with TBST diluted 5 % skim milk for 1h at room temperature or TBST diluted 5 % BSA for 4 h at 4℃. Then they were incubated with primary antibodies of CPSF6 (Cat No. sc-376228.Santacruz, USA), c-Myc (Cat No ab32072, Abcam, USA), FBW7 (Cat No ab109617, Abcam, Waltham, MA, USA), SKP2 (Cat.No sc-7164, Santacruz Biotechnology, Dallas, TX,USA), HK2 (Cat No 2106, Cell Signaling Technology, USA), PKM2 (Cat.No 4053, Cell Signaling Technology, USA), LDH (Cat No sc-133123, Santacruz, USA) and β-actin (Cat No A2228, Merck KGaA, USA) diluted in 5 % BSA in TBST overnight at 4 ℃, washed three times for 10 min with TBST, and incubated with HRP-conjugated secondary antibodies (Cell Signaling Technology, USA) for 2h. Expression was visualized by using ECL Immunoblotting detection reagent (GE Healthcare, Giles, UK).
